# Supplementary material for: West Nile Virus, an Underdiagnosed Cause of Acute Fever of Unknown Origin and Neurological Disease among Hospitalized Patients in South Africa
Source: MDPI journal article supplement (doi:10.3390/v15112207), 2023-11-02
Supplement: s1 [file s1]

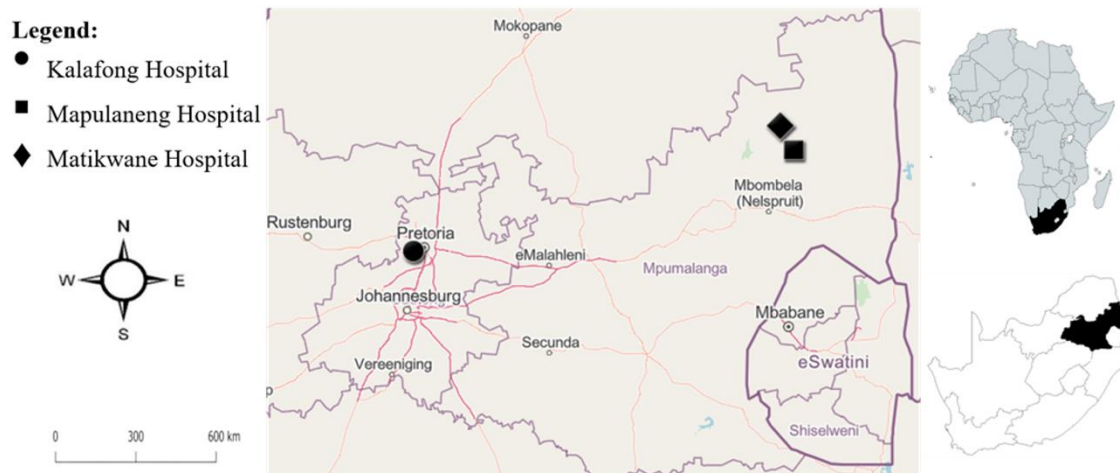

**Figure S1:** Map showing the locations of the 10 public sector hospitals where CSF was sampled from patients experiencing acute neurological disease in 2017 that made up the neurological cohort

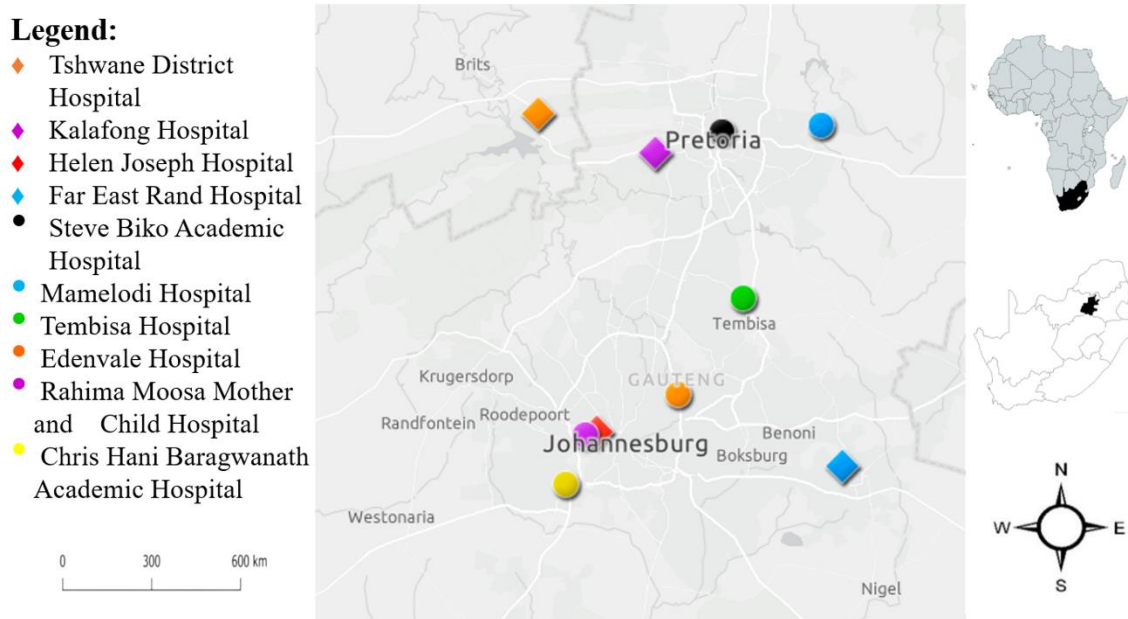

**Figure S2:** The three hospitals that make up the ANDEMIA sentinel sites. The urban Gauteng site comprised of Kalafong Provincial Tertiary Hospital and the rural Mpumalanga site, comprised of the Mapulaneng and Matikwane Hospitals,

**Table S1.** Details of the flavivirus isolates used in additional neutralization tests

| <b>Virus</b>      | <b>Isolate name, passage number</b> | <b>Details</b>                                                                                                                                              | <b>GenBank Accession no.</b> |
|-------------------|-------------------------------------|-------------------------------------------------------------------------------------------------------------------------------------------------------------|------------------------------|
| Banzi virus       | LAP13MP25, P2                       | Isolate obtained from a homogenate of <i>Culex rubinotus</i> mosquitoes collected in 2013 in Lapalala, South Africa                                         | OL411961                     |
| Bagaza virus      | ZRU349/17/3, P5                     | Isolate obtained from the brain of a Himalayan monal pheasants ( <i>Lophophorus impejanus</i> ) who had presented with neurological signs                   | MN329586                     |
| Usutu virus       | SAAr 1776, P7                       | Isolate first obtained 1958 from mosquitoes in South Africa. The isolate was supplied by the Centers for Disease Control and Prevention, Fort Collins, USA. | AY453412                     |
| Wesselsbron virus | AV259, P4                           | Isolate obtained from a non-fatal encephalitic human case. Supplied by the National Institute of Communicable Diseases, Gauteng, South Africa               | JN226796                     |

**Table S2:** Details of the PCR, ELISA and VNT results for the WNV positive patients detected in the neurological cohort in 2017 and in the AFDUC cohort, 2019 to 2021.

| ZRU Number                 | Year enrolled | Hospital                              | Age (years) | Sex    | Disease presentation | PCR      | WNV IgM      | WNV VNT  | VNT titer     | Specimen tested |
|----------------------------|---------------|---------------------------------------|-------------|--------|----------------------|----------|--------------|----------|---------------|-----------------|
| <b>Neurological cohort</b> |               |                                       |             |        |                      |          |              |          |               |                 |
| ZRUNH072/17                | 2017          | Tembisa hospital                      | 28          | Female | Meningitis           | Negative | Positive     | Positive | ≥1:32         | CSF             |
| ZRUNH212/17                | 2017          | Mamelodi Regional Hospital            | 1           | Female | Encephalitis         | Negative | Positive     | Positive | ≥1:16         | CSF             |
| ZRUNH267/17                | 2017          | Steve Biko Academic Hospital          | 62          | Male   | Encephalitis         | Negative | Positive     | Positive | ≥1:32         | CSF             |
| ZRUNH273/17                | 2017          | Mamelodi Regional Hospital            | 1           | Female | Febrile convulsion   | Positive | Negative     | Positive | Not performed | CSF             |
| ZRUNH299/17                | 2017          | Steve Biko Academic Hospital          | 28          | Female | Encephalopathy       | Negative | Inconclusive | Positive | ≥1:16         | CSF             |
| ZRUNH497/17                | 2017          | Mamelodi Regional Hospital            | 2           | Male   | Meningitis           | Positive | Negative     | Positive | Not performed | CSF             |
| ZRUNH511/17                | 2017          | Kalafong Provincial Tertiary Hospital | 19          | Female | Meningitis           | Negative | Positive     | Positive | ≥1:32         | CSF             |
| ZRUNH557/17                | 2017          | Kalafong Provincial Tertiary Hospital | 1           | Female | Meningitis           | Negative | Positive     | Positive | ≥1:16         | CSF             |
| <b>AFDUC cohort</b>        |               |                                       |             |        |                      |          |              |          |               |                 |
| ZRUA0336/19                | 2019          | Kalafong Provincial Tertiary Hospital | 1           | Female | Severe               | Negative | Positive     | Positive | ≥1:32         | Plasma/Serum    |
| ZRUA0360/19                | 2019          | Kalafong Provincial Tertiary Hospital | 2           | Female | Moderate             | Negative | Inconclusive | Positive | ≥1:32         | Plasma/Serum    |
| ZRUA0378/19                | 2019          | Mapulaneng Hospital                   | 22          | Male   | Severe               | Negative | Positive     | Positive | ≥1:32         | Plasma/Serum    |
| ZRUA0382/19                | 2019          | Kalafong Provincial Tertiary Hospital | 36          | Male   | Severe               | Negative | Inconclusive | Positive | ≥1:32         | Plasma/Serum    |
| ZRUA0394/19                | 2019          | Mapulaneng Hospital                   | 1           | Male   | Severe               | Negative | Inconclusive | Positive | ≥1:32         | Plasma/Serum    |
| ZRUA0398/19                | 2019          | Matikwana Hospital                    | 16          | Female | Severe               | Negative | Positive     | Positive | ≥1:32         | Plasma/Serum    |

|             |      |                                       |    |        |          |          |              |          |             |              |
|-------------|------|---------------------------------------|----|--------|----------|----------|--------------|----------|-------------|--------------|
| ZRUA0431/19 | 2019 | Matikwana Hospital                    | 43 | Female | Severe   | Negative | Inconclusive | Positive | $\geq 1:32$ | Plasma/Serum |
| ZRUA0469/19 | 2019 | Mapulaneng Hospital                   | 34 | Male   | Severe   | Negative | Inconclusive | Positive | $\geq 1:32$ | Plasma/Serum |
| ZRUA0471/19 | 2019 | Kalafong Provincial Tertiary Hospital | 2  | Female | Moderate | Negative | Positive     | Positive | $\geq 1:16$ | Plasma/Serum |
| ZRUA0502/19 | 2019 | Mapulaneng Hospital                   | 1  | Male   | Severe   | Negative | Positive     | Positive | $\geq 1:32$ | Plasma/Serum |
| ZRUA0549/19 | 2019 | Matikwana Hospital                    | 13 | Male   | Severe   | Negative | Positive     | Positive | $\geq 1:32$ | Plasma/Serum |
| ZRUA0573/19 | 2019 | Kalafong Provincial Tertiary Hospital | 1  | Female | Severe   | Negative | Positive     | Positive | $\geq 1:32$ | Plasma/Serum |
| ZRUA0576/19 | 2019 | Kalafong Provincial Tertiary Hospital | 4  | Female | Moderate | Negative | Inconclusive | Positive | $\geq 1:16$ | Plasma/Serum |
| ZRUA0580/19 | 2019 | Matikwana Hospital                    | 57 | Female | Moderate | Negative | Inconclusive | Positive | $\geq 1:32$ | Plasma/Serum |
| ZRUA0583/19 | 2019 | Kalafong Provincial Tertiary Hospital | 1  | Female | Severe   | Negative | Inconclusive | Positive | $\geq 1:32$ | Plasma/Serum |
| ZRUA0637/19 | 2019 | Kalafong Provincial Tertiary Hospital | 0  | Female | Severe   | Negative | Inconclusive | Positive | $\geq 1:32$ | Plasma/Serum |
| ZRUA1095/20 | 2020 | Mapulaneng Hospital                   | 8  | Female | Severe   | Negative | Positive     | Positive | $\geq 1:32$ | Plasma/Serum |
| ZRUA1117/20 | 2020 | Mapulaneng Hospital                   | 36 | Male   | Severe   | Negative | Positive     | Positive | $\geq 1:16$ | CSF          |
| ZRUA1120/20 | 2020 | Mapulaneng Hospital                   | 90 | Male   | Severe   | Negative | Inconclusive | Positive | $\geq 1:32$ | Plasma/Serum |
| ZRUA1208/20 | 2020 | Kalafong Provincial Tertiary Hospital | 8  | Male   | Moderate | Negative | Inconclusive | Positive | $\geq 1:32$ | Plasma/Serum |
| ZRUA1231/20 | 2020 | Kalafong Provincial Tertiary Hospital | 2  | Female | Severe   | Negative | Inconclusive | Positive | $\geq 1:32$ | Plasma/Serum |
| ZRUA1235/20 | 2020 | Kalafong Provincial Tertiary Hospital | 6  | Female | Severe   | Negative | Positive     | Positive | $\geq 1:32$ | Plasma/Serum |
| ZRUA1249/20 | 2020 | Kalafong Provincial Tertiary Hospital | 4  | Male   | Moderate | Negative | Inconclusive | Positive | $\geq 1:32$ | Plasma/Serum |
| ZRUA1252/20 | 2020 | Mapulaneng Hospital                   | 23 | Male   | Moderate | Negative | Positive     | Positive | $\geq 1:32$ | Plasma/Serum |
| ZRUA1258/20 | 2020 | Mapulaneng Hospital                   | 21 | Female | Severe   | Negative | Positive     | Positive | $\geq 1:32$ | Plasma/Serum |
| ZRUA1265/20 | 2020 | Kalafong Provincial Tertiary Hospital | 0  | Female | Severe   | Negative | Positive     | Positive | $\geq 1:32$ | Plasma/Serum |

|             |      |                                       |    |        |          |          |              |          |             |              |
|-------------|------|---------------------------------------|----|--------|----------|----------|--------------|----------|-------------|--------------|
| ZRUA1329/20 | 2020 | Kalafong Provincial Tertiary Hospital | 1  | Male   | Moderate | Negative | Inconclusive | Positive | $\geq 1:16$ | Plasma/Serum |
| ZRUA1361/20 | 2020 | Mapulaneng Hospital                   | 25 | Male   | Severe   | Negative | Positive     | Positive | $\geq 1:32$ | Plasma/Serum |
| ZRUA1515/21 | 2021 | Kalafong Provincial Tertiary Hospital | 1  | Female | Severe   | Negative | Positive     | Positive | $\geq 1:32$ | Plasma/Serum |
| ZRUA1525/21 | 2021 | Mapulaneng Hospital                   | 53 | Male   | Severe   | Negative | Positive     | Positive | $\geq 1:32$ | CSF          |
| ZRUA1526/21 | 2021 | Mapulaneng Hospital                   | 37 | Male   | Severe   | Negative | Positive     | Positive | $\geq 1:32$ | Plasma/Serum |
| ZRUA1530/21 | 2021 | Matikwana Hospital                    | 3  | Female | Severe   | Negative | Positive     | Positive | $\geq 1:32$ | Plasma/Serum |
| ZRUA1539/21 | 2021 | Mapulaneng Hospital                   | 39 | Female | Moderate | Negative | Inconclusive | Positive | $\geq 1:32$ | Plasma/Serum |
| ZRUA1544/21 | 2021 | Mapulaneng Hospital                   | 37 | Male   | Severe   | Negative | Inconclusive | Positive | $\geq 1:16$ | Plasma/Serum |
| ZRUA1547/21 | 2021 | Mapulaneng Hospital                   | 24 | Male   | Severe   | Negative | Inconclusive | Positive | $\geq 1:32$ | Plasma/Serum |
| ZRUA1552/21 | 2021 | Mapulaneng Hospital                   | 2  | Female | Severe   | Negative | Inconclusive | Positive | $\geq 1:32$ | Plasma/Serum |
| ZRUA1601/21 | 2021 | Mapulaneng Hospital                   | 29 | Female | Severe   | Negative | Positive     | Positive | $\geq 1:16$ | Plasma/Serum |
| ZRUA1603/21 | 2021 | Mapulaneng Hospital                   | 25 | Female | Moderate | Negative | Inconclusive | Positive | $\geq 1:32$ | Plasma/Serum |
| ZRUA1566/21 | 2021 | Mapulaneng Hospital                   | 15 | Female | Severe   | Negative | Positive     | Positive | $\geq 1:32$ | Plasma/Serum |
| ZRUA1569/21 | 2021 | Kalafong Provincial Tertiary Hospital | 1  | Male   | Moderate | Negative | Positive     | Positive | $\geq 1:16$ | Plasma/Serum |

**Table S3.** Demographic data of the AFDUC patients enrolled for West Nile virus molecular testing 2019 to 2021.

|                                                                                           | Gauteng (n=646) |                            | Mpumalanga (n=333) |                            | Total (N=979) |                        |
|-------------------------------------------------------------------------------------------|-----------------|----------------------------|--------------------|----------------------------|---------------|------------------------|
|                                                                                           | Frequency       | Percentage (%) [95.00% CI] | Frequency          | Percentage (%) [95.00% CI] | Frequency     | Percentage [95.00% CI] |
| <b>Age</b>                                                                                |                 |                            |                    |                            |               |                        |
| Children (0-12 years)                                                                     | 505/646         | 78,17 [74,83 - 81,19]      | 193/333            | 57,96 [52,59 - 61,14]      | 698/979       | 71,30 [68,38 - 74,04]  |
| Adolescents (13-18 years)                                                                 | 5/646           | 0,77 [0,33 - 1,80]         | 11/333             | 3,30 [1,85 - 5,82]         | 16/979        | 1,63 [1,01 - 2,64]     |
| Adults (19-59 years)                                                                      | 133/646         | 20,59 [17,65 - 23,88]      | 115/333            | 34,53 [29,63 - 39,79]      | 248/979       | 25,33 [22,71 - 28,15]  |
| Senior adults (≥60 years)                                                                 | 3/646           | 0,46 [0,16 - 1,36]         | 14/333             | 4,20 [2,52 - 6,93]         | 17/979        | 1,74 [1,09 - 2,76]     |
| <b>Sex</b>                                                                                |                 |                            |                    |                            |               |                        |
| Male                                                                                      | 362/646         | 56,04 [52,19 - 59,82]      | 179/333            | 53,75 [48,39 - 59,04]      | 541/979       | 55,26 [52,13 - 58,35]  |
| Female                                                                                    | 283/646         | 43,81 [40,03 - 47,66]      | 151/333            | 45,35 [40,08 - 50,72]      | 434/979       | 44,33 [41,25 - 47,46]  |
| Unknown                                                                                   | 1/646           | 0,15 [0,03 - 0,87]         | 3/333              | 0,90 [0,31 - 2,61]         | 4/979         | 0,41 [0,16 - 1,05]     |
| Table footnotes: AFDUC = acute febrile disease of unknown cause, CI = confidence interval |                 |                            |                    |                            |               |                        |
